# Supplementary material for: The efficiency of universal mitochondrial DNA barcodes for species discrimination of Pomacea canaliculata and Pomacea maculata
Source: PeerJ. 2020 Apr 1;8:e8755. doi: 10.7717/peerj.8755 (PMC7127494; doi:10.7717/peerj.8755)
Supplement: Table S2 — The genetic distances were computed using the K2P (below diagonal) and uncorrected p-distance (above diagonal). [file peerj-08-8755-s002.xls]

## Sheet: MatrixOutput
Table S2: Genetic divergence analysis of the COI marker based on pairwise alignment of all 40 Pomacea specimens. The genetic distances were computed using the K2P (below diagonal) and uncorrected p-distance (above diagonal).
Sample ID	SJ2	PJ13	SJ14	PJ5	PJ45	SJ5	SJ7	SJ13	PJ1	GC20	PJ14	GC8	LL2	GC18	LL5	PJ16	LL6	PJ20	GC6	PJ29	AN2	GC11	AN5	GC7	GC1	GC2	AN1	CC2	PJ11	PJ15	PJ2	PJ3	PJ4	AN3	AN4	CC1	CC4	GC5	CC5	CC3
SJ2		0	0	0	0	0	0	0	0	0.0425532	0.0425532	0.0425532	0.0425532	0.0425532	0.0474632	0.0425532	0.0425532	0.0425532	0.0425532	0.0425532	0.0998363	0.0998363	0.0998363	0.0998363	0.0998363	0.0998363	0.0998363	0.0998363	0.0998363	0.0998363	0.0998363	0.0998363	0.0998363	0.0998363	0.0998363	0.0998363	0.0998363	0.0998363	0.0998363	0.0998363
PJ13	0		0	0	0	0	0	0	0	0.0425532	0.0425532	0.0425532	0.0425532	0.0425532	0.0474632	0.0425532	0.0425532	0.0425532	0.0425532	0.0425532	0.0998363	0.0998363	0.0998363	0.0998363	0.0998363	0.0998363	0.0998363	0.0998363	0.0998363	0.0998363	0.0998363	0.0998363	0.0998363	0.0998363	0.0998363	0.0998363	0.0998363	0.0998363	0.0998363	0.0998363
SJ14	0	0		0	0	0	0	0	0	0.0425532	0.0425532	0.0425532	0.0425532	0.0425532	0.0474632	0.0425532	0.0425532	0.0425532	0.0425532	0.0425532	0.0998363	0.0998363	0.0998363	0.0998363	0.0998363	0.0998363	0.0998363	0.0998363	0.0998363	0.0998363	0.0998363	0.0998363	0.0998363	0.0998363	0.0998363	0.0998363	0.0998363	0.0998363	0.0998363	0.0998363
PJ5	0	0	0		0	0	0	0	0	0.0425532	0.0425532	0.0425532	0.0425532	0.0425532	0.0474632	0.0425532	0.0425532	0.0425532	0.0425532	0.0425532	0.0998363	0.0998363	0.0998363	0.0998363	0.0998363	0.0998363	0.0998363	0.0998363	0.0998363	0.0998363	0.0998363	0.0998363	0.0998363	0.0998363	0.0998363	0.0998363	0.0998363	0.0998363	0.0998363	0.0998363
PJ45	0	0	0	0		0	0	0	0	0.0425532	0.0425532	0.0425532	0.0425532	0.0425532	0.0474632	0.0425532	0.0425532	0.0425532	0.0425532	0.0425532	0.0998363	0.0998363	0.0998363	0.0998363	0.0998363	0.0998363	0.0998363	0.0998363	0.0998363	0.0998363	0.0998363	0.0998363	0.0998363	0.0998363	0.0998363	0.0998363	0.0998363	0.0998363	0.0998363	0.0998363
SJ5	0	0	0	0	0		0	0	0	0.0425532	0.0425532	0.0425532	0.0425532	0.0425532	0.0474632	0.0425532	0.0425532	0.0425532	0.0425532	0.0425532	0.0998363	0.0998363	0.0998363	0.0998363	0.0998363	0.0998363	0.0998363	0.0998363	0.0998363	0.0998363	0.0998363	0.0998363	0.0998363	0.0998363	0.0998363	0.0998363	0.0998363	0.0998363	0.0998363	0.0998363
SJ7	0	0	0	0	0	0		0	0	0.0425532	0.0425532	0.0425532	0.0425532	0.0425532	0.0474632	0.0425532	0.0425532	0.0425532	0.0425532	0.0425532	0.0998363	0.0998363	0.0998363	0.0998363	0.0998363	0.0998363	0.0998363	0.0998363	0.0998363	0.0998363	0.0998363	0.0998363	0.0998363	0.0998363	0.0998363	0.0998363	0.0998363	0.0998363	0.0998363	0.0998363
S13	0	0	0	0	0	0	0		0	0.0425532	0.0425532	0.0425532	0.0425532	0.0425532	0.0474632	0.0425532	0.0425532	0.0425532	0.0425532	0.0425532	0.0998363	0.0998363	0.0998363	0.0998363	0.0998363	0.0998363	0.0998363	0.0998363	0.0998363	0.0998363	0.0998363	0.0998363	0.0998363	0.0998363	0.0998363	0.0998363	0.0998363	0.0998363	0.0998363	0.0998363
PJ1	0	0	0	0	0	0	0	0		0.0425532	0.0425532	0.0425532	0.0425532	0.0425532	0.0474632	0.0425532	0.0425532	0.0425532	0.0425532	0.0425532	0.0998363	0.0998363	0.0998363	0.0998363	0.0998363	0.0998363	0.0998363	0.0998363	0.0998363	0.0998363	0.0998363	0.0998363	0.0998363	0.0998363	0.0998363	0.0998363	0.0998363	0.0998363	0.0998363	0.0998363
GC20	0.0442036	0.0442036	0.0442036	0.0442036	0.0442036	0.0442036	0.0442036	0.0442036	0.0442036		0	0	0	0	0.00818331	0	0	0	0	0	0.101473	0.101473	0.101473	0.101473	0.101473	0.101473	0.101473	0.101473	0.101473	0.101473	0.101473	0.101473	0.101473	0.101473	0.101473	0.101473	0.101473	0.101473	0.101473	0.101473
PJ14	0.0442036	0.0442036	0.0442036	0.0442036	0.0442036	0.0442036	0.0442036	0.0442036	0.0442036	0		0	0	0	0.00818331	0	0	0	0	0	0.101473	0.101473	0.101473	0.101473	0.101473	0.101473	0.101473	0.101473	0.101473	0.101473	0.101473	0.101473	0.101473	0.101473	0.101473	0.101473	0.101473	0.101473	0.101473	0.101473
GC8	0.0442036	0.0442036	0.0442036	0.0442036	0.0442036	0.0442036	0.0442036	0.0442036	0.0442036	0	0		0	0	0.00818331	0	0	0	0	0	0.101473	0.101473	0.101473	0.101473	0.101473	0.101473	0.101473	0.101473	0.101473	0.101473	0.101473	0.101473	0.101473	0.101473	0.101473	0.101473	0.101473	0.101473	0.101473	0.101473
LL2	0.0442036	0.0442036	0.0442036	0.0442036	0.0442036	0.0442036	0.0442036	0.0442036	0.0442036	0	0	0		0	0.00818331	0	0	0	0	0	0.101473	0.101473	0.101473	0.101473	0.101473	0.101473	0.101473	0.101473	0.101473	0.101473	0.101473	0.101473	0.101473	0.101473	0.101473	0.101473	0.101473	0.101473	0.101473	0.101473
GC18	0.0442036	0.0442036	0.0442036	0.0442036	0.0442036	0.0442036	0.0442036	0.0442036	0.0442036	0	0	0	0		0.00818331	0	0	0	0	0	0.101473	0.101473	0.101473	0.101473	0.101473	0.101473	0.101473	0.101473	0.101473	0.101473	0.101473	0.101473	0.101473	0.101473	0.101473	0.101473	0.101473	0.101473	0.101473	0.101473
LL5	0.049375	0.049375	0.049375	0.049375	0.049375	0.049375	0.049375	0.049375	0.049375	0.00823399	0.00823399	0.00823399	0.00823399	0.00823399		0.00818331	0.00818331	0.00818331	0.00818331	0.00818331	0.10802	0.10802	0.10802	0.10802	0.10802	0.10802	0.10802	0.10802	0.10802	0.10802	0.10802	0.10802	0.10802	0.10802	0.10802	0.10802	0.10802	0.10802	0.10802	0.10802
PJ16	0.0442036	0.0442036	0.0442036	0.0442036	0.0442036	0.0442036	0.0442036	0.0442036	0.0442036	0	0	0	0	0	0.00823399		0	0	0	0	0.101473	0.101473	0.101473	0.101473	0.101473	0.101473	0.101473	0.101473	0.101473	0.101473	0.101473	0.101473	0.101473	0.101473	0.101473	0.101473	0.101473	0.101473	0.101473	0.101473
LL6	0.0442036	0.0442036	0.0442036	0.0442036	0.0442036	0.0442036	0.0442036	0.0442036	0.0442036	0	0	0	0	0	0.00823399	0		0	0	0	0.101473	0.101473	0.101473	0.101473	0.101473	0.101473	0.101473	0.101473	0.101473	0.101473	0.101473	0.101473	0.101473	0.101473	0.101473	0.101473	0.101473	0.101473	0.101473	0.101473
PJ20	0.0442036	0.0442036	0.0442036	0.0442036	0.0442036	0.0442036	0.0442036	0.0442036	0.0442036	0	0	0	0	0	0.00823399	0	0		0	0	0.101473	0.101473	0.101473	0.101473	0.101473	0.101473	0.101473	0.101473	0.101473	0.101473	0.101473	0.101473	0.101473	0.101473	0.101473	0.101473	0.101473	0.101473	0.101473	0.101473
GC6	0.0442036	0.0442036	0.0442036	0.0442036	0.0442036	0.0442036	0.0442036	0.0442036	0.0442036	0	0	0	0	0	0.00823399	0	0	0		0	0.101473	0.101473	0.101473	0.101473	0.101473	0.101473	0.101473	0.101473	0.101473	0.101473	0.101473	0.101473	0.101473	0.101473	0.101473	0.101473	0.101473	0.101473	0.101473	0.101473
PJ29	0.0442036	0.0442036	0.0442036	0.0442036	0.0442036	0.0442036	0.0442036	0.0442036	0.0442036	0	0	0	0	0	0.00823399	0	0	0	0		0.101473	0.101473	0.101473	0.101473	0.101473	0.101473	0.101473	0.101473	0.101473	0.101473	0.101473	0.101473	0.101473	0.101473	0.101473	0.101473	0.101473	0.101473	0.101473	0.101473
AN2	0.110055	0.110055	0.110055	0.110055	0.110055	0.110055	0.110055	0.110055	0.110055	0.112076	0.112076	0.112076	0.112076	0.112076	0.119344	0.112076	0.112076	0.112076	0.112076	0.112076		0	0	0	0	0	0	0	0	0	0	0	0	0	0	0	0	0	0	0
GC11	0.110055	0.110055	0.110055	0.110055	0.110055	0.110055	0.110055	0.110055	0.110055	0.112076	0.112076	0.112076	0.112076	0.112076	0.119344	0.112076	0.112076	0.112076	0.112076	0.112076	0		0	0	0	0	0	0	0	0	0	0	0	0	0	0	0	0	0	0
AN5	0.110055	0.110055	0.110055	0.110055	0.110055	0.110055	0.110055	0.110055	0.110055	0.112076	0.112076	0.112076	0.112076	0.112076	0.119344	0.112076	0.112076	0.112076	0.112076	0.112076	0	0		0	0	0	0	0	0	0	0	0	0	0	0	0	0	0	0	0
GC7	0.110055	0.110055	0.110055	0.110055	0.110055	0.110055	0.110055	0.110055	0.110055	0.112076	0.112076	0.112076	0.112076	0.112076	0.119344	0.112076	0.112076	0.112076	0.112076	0.112076	0	0	0		0	0	0	0	0	0	0	0	0	0	0	0	0	0	0	0
GC1	0.110055	0.110055	0.110055	0.110055	0.110055	0.110055	0.110055	0.110055	0.110055	0.112076	0.112076	0.112076	0.112076	0.112076	0.119344	0.112076	0.112076	0.112076	0.112076	0.112076	0	0	0	0		0	0	0	0	0	0	0	0	0	0	0	0	0	0	0
GC2	0.110055	0.110055	0.110055	0.110055	0.110055	0.110055	0.110055	0.110055	0.110055	0.112076	0.112076	0.112076	0.112076	0.112076	0.119344	0.112076	0.112076	0.112076	0.112076	0.112076	0	0	0	0	0		0	0	0	0	0	0	0	0	0	0	0	0	0	0
AN1	0.110055	0.110055	0.110055	0.110055	0.110055	0.110055	0.110055	0.110055	0.110055	0.112076	0.112076	0.112076	0.112076	0.112076	0.119344	0.112076	0.112076	0.112076	0.112076	0.112076	0	0	0	0	0	0		0	0	0	0	0	0	0	0	0	0	0	0	0
CC2	0.110055	0.110055	0.110055	0.110055	0.110055	0.110055	0.110055	0.110055	0.110055	0.112076	0.112076	0.112076	0.112076	0.112076	0.119344	0.112076	0.112076	0.112076	0.112076	0.112076	0	0	0	0	0	0	0		0	0	0	0	0	0	0	0	0	0	0	0
PJ11	0.110055	0.110055	0.110055	0.110055	0.110055	0.110055	0.110055	0.110055	0.110055	0.112076	0.112076	0.112076	0.112076	0.112076	0.119344	0.112076	0.112076	0.112076	0.112076	0.112076	0	0	0	0	0	0	0	0		0	0	0	0	0	0	0	0	0	0	0
PJ15	0.110055	0.110055	0.110055	0.110055	0.110055	0.110055	0.110055	0.110055	0.110055	0.112076	0.112076	0.112076	0.112076	0.112076	0.119344	0.112076	0.112076	0.112076	0.112076	0.112076	0	0	0	0	0	0	0	0	0		0	0	0	0	0	0	0	0	0	0
PJ2	0.110055	0.110055	0.110055	0.110055	0.110055	0.110055	0.110055	0.110055	0.110055	0.112076	0.112076	0.112076	0.112076	0.112076	0.119344	0.112076	0.112076	0.112076	0.112076	0.112076	0	0	0	0	0	0	0	0	0	0		0	0	0	0	0	0	0	0	0
PJ3	0.110055	0.110055	0.110055	0.110055	0.110055	0.110055	0.110055	0.110055	0.110055	0.112076	0.112076	0.112076	0.112076	0.112076	0.119344	0.112076	0.112076	0.112076	0.112076	0.112076	0	0	0	0	0	0	0	0	0	0	0		0	0	0	0	0	0	0	0
PJ4	0.110055	0.110055	0.110055	0.110055	0.110055	0.110055	0.110055	0.110055	0.110055	0.112076	0.112076	0.112076	0.112076	0.112076	0.119344	0.112076	0.112076	0.112076	0.112076	0.112076	0	0	0	0	0	0	0	0	0	0	0	0		0	0	0	0	0	0	0
AN3	0.110055	0.110055	0.110055	0.110055	0.110055	0.110055	0.110055	0.110055	0.110055	0.112076	0.112076	0.112076	0.112076	0.112076	0.119344	0.112076	0.112076	0.112076	0.112076	0.112076	0	0	0	0	0	0	0	0	0	0	0	0	0		0	0	0	0	0	0
AN4	0.110055	0.110055	0.110055	0.110055	0.110055	0.110055	0.110055	0.110055	0.110055	0.112076	0.112076	0.112076	0.112076	0.112076	0.119344	0.112076	0.112076	0.112076	0.112076	0.112076	0	0	0	0	0	0	0	0	0	0	0	0	0	0		0	0	0	0	0
CC1	0.110055	0.110055	0.110055	0.110055	0.110055	0.110055	0.110055	0.110055	0.110055	0.112076	0.112076	0.112076	0.112076	0.112076	0.119344	0.112076	0.112076	0.112076	0.112076	0.112076	0	0	0	0	0	0	0	0	0	0	0	0	0	0	0		0	0	0	0
CC4	0.110055	0.110055	0.110055	0.110055	0.110055	0.110055	0.110055	0.110055	0.110055	0.112076	0.112076	0.112076	0.112076	0.112076	0.119344	0.112076	0.112076	0.112076	0.112076	0.112076	0	0	0	0	0	0	0	0	0	0	0	0	0	0	0	0		0	0	0
GC5	0.110055	0.110055	0.110055	0.110055	0.110055	0.110055	0.110055	0.110055	0.110055	0.112076	0.112076	0.112076	0.112076	0.112076	0.119344	0.112076	0.112076	0.112076	0.112076	0.112076	0	0	0	0	0	0	0	0	0	0	0	0	0	0	0	0	0		0	0
CC5	0.110055	0.110055	0.110055	0.110055	0.110055	0.110055	0.110055	0.110055	0.110055	0.112076	0.112076	0.112076	0.112076	0.112076	0.119344	0.112076	0.112076	0.112076	0.112076	0.112076	0	0	0	0	0	0	0	0	0	0	0	0	0	0	0	0	0	0		0
CC3	0.110055	0.110055	0.110055	0.110055	0.110055	0.110055	0.110055	0.110055	0.110055	0.112076	0.112076	0.112076	0.112076	0.112076	0.119344	0.112076	0.112076	0.112076	0.112076	0.112076	0	0	0	0	0	0	0	0	0	0	0	0	0	0	0	0	0	0	0

## Sheet: Caption
Table. Estimates of Evolutionary Divergence between Sequences
The number of base substitutions per site from between sequences are shown. Analyses were conducted using the Kimura 2-parameter model [1]. The analysis involved 40 nucleotide sequences. Codon positions included were 1st+2nd+3rd+Noncoding. All positions containing gaps and missing data were eliminated. There were a total of 611 positions in the final dataset. Evolutionary analyses were conducted …
1. Kimura M. (1980). A simple method for estimating evolutionary rate of base substitutions through comparative studies of nucleotide sequences. Journal of Molecular Evolution 16:111-120.
2. Kumar S., Stecher G., and Tamura K. (2016). MEGA7: Molecular Evolutionary Genetics Analysis version 7.0 for bigger datasets.Molecular Biology and Evolution 33:1870-1874.
Disclaimer: Although utmost care has been taken to ensure the correctness of the caption, the caption text is provided "as is" without any warranty of any kind. Authors advise the user to carefully check the caption prior to its use for any purpose and report any errors or problems to the authors immediately (www.megasoftware.net). In no event shall the authors and their employers be liable for a…
