# Supplementary material for: The efficiency of universal mitochondrial DNA barcodes for species discrimination of Pomacea canaliculata and Pomacea maculata
Source: PeerJ. 2020 Apr 1;8:e8755. doi: 10.7717/peerj.8755 (PMC7127494; doi:10.7717/peerj.8755)
Supplement: Table S3 — The genetic distances were computed using the K2P (below diagonal) and uncorrected p-distance (above diagonal). [file peerj-08-8755-s003.xls]

## Sheet: MatrixOutput
Table S3: Genetic divergence analysis of the 16S rDNA marker based on pairwise alignment of all 40 Pomacea specimens. The genetic distances were computed using the K2P (below diagonal) and uncorrected p-distance (above diagonal).
Sample ID	AN5	CC2	CC3	GC1	GC2	GC5	GC11	PJ15	PJ11	PJ4	PJ3	PJ2	CC5	AN1	CC4	CC1	AN4	AN2	AN3	GC6	GC7	GC8	GC20	GC18	PJ14	LL2	PJ20	LL5	LL6	PJ16	PJ29	SJ2	SJ5	SJ7	SJ13	SJ14	PJ1	PJ13	PJ45	PJ5
AN5		0	0	0	0	0	0	0.00214133	0.00214133	0.00214133	0.00214133	0.00214133	0.00214133	0.00214133	0.00214133	0.00214133	0.00214133	0.00214133	0.00214133	0.0235546	0.0235546	0.0235546	0.0235546	0.0235546	0.0235546	0.0235546	0.0235546	0.0235546	0.0235546	0.0235546	0.0235546	0.0256959	0.0256959	0.0256959	0.0256959	0.0256959	0.0256959	0.0256959	0.0256959	0.0256959
CC2	0		0	0	0	0	0	0.00214133	0.00214133	0.00214133	0.00214133	0.00214133	0.00214133	0.00214133	0.00214133	0.00214133	0.00214133	0.00214133	0.00214133	0.0235546	0.0235546	0.0235546	0.0235546	0.0235546	0.0235546	0.0235546	0.0235546	0.0235546	0.0235546	0.0235546	0.0235546	0.0256959	0.0256959	0.0256959	0.0256959	0.0256959	0.0256959	0.0256959	0.0256959	0.0256959
CC3	0	0		0	0	0	0	0.00214133	0.00214133	0.00214133	0.00214133	0.00214133	0.00214133	0.00214133	0.00214133	0.00214133	0.00214133	0.00214133	0.00214133	0.0235546	0.0235546	0.0235546	0.0235546	0.0235546	0.0235546	0.0235546	0.0235546	0.0235546	0.0235546	0.0235546	0.0235546	0.0256959	0.0256959	0.0256959	0.0256959	0.0256959	0.0256959	0.0256959	0.0256959	0.0256959
GC1	0	0	0		0	0	0	0.00214133	0.00214133	0.00214133	0.00214133	0.00214133	0.00214133	0.00214133	0.00214133	0.00214133	0.00214133	0.00214133	0.00214133	0.0235546	0.0235546	0.0235546	0.0235546	0.0235546	0.0235546	0.0235546	0.0235546	0.0235546	0.0235546	0.0235546	0.0235546	0.0256959	0.0256959	0.0256959	0.0256959	0.0256959	0.0256959	0.0256959	0.0256959	0.0256959
GC2	0	0	0	0		0	0	0.00214133	0.00214133	0.00214133	0.00214133	0.00214133	0.00214133	0.00214133	0.00214133	0.00214133	0.00214133	0.00214133	0.00214133	0.0235546	0.0235546	0.0235546	0.0235546	0.0235546	0.0235546	0.0235546	0.0235546	0.0235546	0.0235546	0.0235546	0.0235546	0.0256959	0.0256959	0.0256959	0.0256959	0.0256959	0.0256959	0.0256959	0.0256959	0.0256959
GC5	0	0	0	0	0		0	0.00214133	0.00214133	0.00214133	0.00214133	0.00214133	0.00214133	0.00214133	0.00214133	0.00214133	0.00214133	0.00214133	0.00214133	0.0235546	0.0235546	0.0235546	0.0235546	0.0235546	0.0235546	0.0235546	0.0235546	0.0235546	0.0235546	0.0235546	0.0235546	0.0256959	0.0256959	0.0256959	0.0256959	0.0256959	0.0256959	0.0256959	0.0256959	0.0256959
GC11	0	0	0	0	0	0		0.00214133	0.00214133	0.00214133	0.00214133	0.00214133	0.00214133	0.00214133	0.00214133	0.00214133	0.00214133	0.00214133	0.00214133	0.0235546	0.0235546	0.0235546	0.0235546	0.0235546	0.0235546	0.0235546	0.0235546	0.0235546	0.0235546	0.0235546	0.0235546	0.0256959	0.0256959	0.0256959	0.0256959	0.0256959	0.0256959	0.0256959	0.0256959	0.0256959
PJ15	0.00214593	0.00214593	0.00214593	0.00214593	0.00214593	0.00214593	0.00214593		0	0	0	0	0	0	0	0	0	0	0	0.0214133	0.0214133	0.0214133	0.0214133	0.0214133	0.0214133	0.0214133	0.0214133	0.0214133	0.0214133	0.0214133	0.0214133	0.0235546	0.0235546	0.0235546	0.0235546	0.0235546	0.0235546	0.0235546	0.0235546	0.0235546
PJ11	0.00214593	0.00214593	0.00214593	0.00214593	0.00214593	0.00214593	0.00214593	0		0	0	0	0	0	0	0	0	0	0	0.0214133	0.0214133	0.0214133	0.0214133	0.0214133	0.0214133	0.0214133	0.0214133	0.0214133	0.0214133	0.0214133	0.0214133	0.0235546	0.0235546	0.0235546	0.0235546	0.0235546	0.0235546	0.0235546	0.0235546	0.0235546
PJ4	0.00214593	0.00214593	0.00214593	0.00214593	0.00214593	0.00214593	0.00214593	0	0		0	0	0	0	0	0	0	0	0	0.0214133	0.0214133	0.0214133	0.0214133	0.0214133	0.0214133	0.0214133	0.0214133	0.0214133	0.0214133	0.0214133	0.0214133	0.0235546	0.0235546	0.0235546	0.0235546	0.0235546	0.0235546	0.0235546	0.0235546	0.0235546
PJ3	0.00214593	0.00214593	0.00214593	0.00214593	0.00214593	0.00214593	0.00214593	0	0	0		0	0	0	0	0	0	0	0	0.0214133	0.0214133	0.0214133	0.0214133	0.0214133	0.0214133	0.0214133	0.0214133	0.0214133	0.0214133	0.0214133	0.0214133	0.0235546	0.0235546	0.0235546	0.0235546	0.0235546	0.0235546	0.0235546	0.0235546	0.0235546
PJ2	0.00214593	0.00214593	0.00214593	0.00214593	0.00214593	0.00214593	0.00214593	0	0	0	0		0	0	0	0	0	0	0	0.0214133	0.0214133	0.0214133	0.0214133	0.0214133	0.0214133	0.0214133	0.0214133	0.0214133	0.0214133	0.0214133	0.0214133	0.0235546	0.0235546	0.0235546	0.0235546	0.0235546	0.0235546	0.0235546	0.0235546	0.0235546
CC5	0.00214593	0.00214593	0.00214593	0.00214593	0.00214593	0.00214593	0.00214593	0	0	0	0	0		0	0	0	0	0	0	0.0214133	0.0214133	0.0214133	0.0214133	0.0214133	0.0214133	0.0214133	0.0214133	0.0214133	0.0214133	0.0214133	0.0214133	0.0235546	0.0235546	0.0235546	0.0235546	0.0235546	0.0235546	0.0235546	0.0235546	0.0235546
AN1	0.00214593	0.00214593	0.00214593	0.00214593	0.00214593	0.00214593	0.00214593	0	0	0	0	0	0		0	0	0	0	0	0.0214133	0.0214133	0.0214133	0.0214133	0.0214133	0.0214133	0.0214133	0.0214133	0.0214133	0.0214133	0.0214133	0.0214133	0.0235546	0.0235546	0.0235546	0.0235546	0.0235546	0.0235546	0.0235546	0.0235546	0.0235546
CC4	0.00214593	0.00214593	0.00214593	0.00214593	0.00214593	0.00214593	0.00214593	0	0	0	0	0	0	0		0	0	0	0	0.0214133	0.0214133	0.0214133	0.0214133	0.0214133	0.0214133	0.0214133	0.0214133	0.0214133	0.0214133	0.0214133	0.0214133	0.0235546	0.0235546	0.0235546	0.0235546	0.0235546	0.0235546	0.0235546	0.0235546	0.0235546
CC1	0.00214593	0.00214593	0.00214593	0.00214593	0.00214593	0.00214593	0.00214593	0	0	0	0	0	0	0	0		0	0	0	0.0214133	0.0214133	0.0214133	0.0214133	0.0214133	0.0214133	0.0214133	0.0214133	0.0214133	0.0214133	0.0214133	0.0214133	0.0235546	0.0235546	0.0235546	0.0235546	0.0235546	0.0235546	0.0235546	0.0235546	0.0235546
AN4	0.00214593	0.00214593	0.00214593	0.00214593	0.00214593	0.00214593	0.00214593	0	0	0	0	0	0	0	0	0		0	0	0.0214133	0.0214133	0.0214133	0.0214133	0.0214133	0.0214133	0.0214133	0.0214133	0.0214133	0.0214133	0.0214133	0.0214133	0.0235546	0.0235546	0.0235546	0.0235546	0.0235546	0.0235546	0.0235546	0.0235546	0.0235546
AN2	0.00214593	0.00214593	0.00214593	0.00214593	0.00214593	0.00214593	0.00214593	0	0	0	0	0	0	0	0	0	0		0	0.0214133	0.0214133	0.0214133	0.0214133	0.0214133	0.0214133	0.0214133	0.0214133	0.0214133	0.0214133	0.0214133	0.0214133	0.0235546	0.0235546	0.0235546	0.0235546	0.0235546	0.0235546	0.0235546	0.0235546	0.0235546
AN3	0.00214593	0.00214593	0.00214593	0.00214593	0.00214593	0.00214593	0.00214593	0	0	0	0	0	0	0	0	0	0	0		0.0214133	0.0214133	0.0214133	0.0214133	0.0214133	0.0214133	0.0214133	0.0214133	0.0214133	0.0214133	0.0214133	0.0214133	0.0235546	0.0235546	0.0235546	0.0235546	0.0235546	0.0235546	0.0235546	0.0235546	0.0235546
GC6	0.0241275	0.0241275	0.0241275	0.0241275	0.0241275	0.0241275	0.0241275	0.0218853	0.0218853	0.0218853	0.0218853	0.0218853	0.0218853	0.0218853	0.0218853	0.0218853	0.0218853	0.0218853	0.0218853		0	0	0	0	0	0	0	0	0	0	0	0.00642398	0.00642398	0.00642398	0.00642398	0.00642398	0.00642398	0.00642398	0.00642398	0.00642398
GC7	0.0241275	0.0241275	0.0241275	0.0241275	0.0241275	0.0241275	0.0241275	0.0218853	0.0218853	0.0218853	0.0218853	0.0218853	0.0218853	0.0218853	0.0218853	0.0218853	0.0218853	0.0218853	0.0218853	0		0	0	0	0	0	0	0	0	0	0	0.00642398	0.00642398	0.00642398	0.00642398	0.00642398	0.00642398	0.00642398	0.00642398	0.00642398
GC8	0.0241275	0.0241275	0.0241275	0.0241275	0.0241275	0.0241275	0.0241275	0.0218853	0.0218853	0.0218853	0.0218853	0.0218853	0.0218853	0.0218853	0.0218853	0.0218853	0.0218853	0.0218853	0.0218853	0	0		0	0	0	0	0	0	0	0	0	0.00642398	0.00642398	0.00642398	0.00642398	0.00642398	0.00642398	0.00642398	0.00642398	0.00642398
GC20	0.0241275	0.0241275	0.0241275	0.0241275	0.0241275	0.0241275	0.0241275	0.0218853	0.0218853	0.0218853	0.0218853	0.0218853	0.0218853	0.0218853	0.0218853	0.0218853	0.0218853	0.0218853	0.0218853	0	0	0		0	0	0	0	0	0	0	0	0.00642398	0.00642398	0.00642398	0.00642398	0.00642398	0.00642398	0.00642398	0.00642398	0.00642398
GC18	0.0241275	0.0241275	0.0241275	0.0241275	0.0241275	0.0241275	0.0241275	0.0218853	0.0218853	0.0218853	0.0218853	0.0218853	0.0218853	0.0218853	0.0218853	0.0218853	0.0218853	0.0218853	0.0218853	0	0	0	0		0	0	0	0	0	0	0	0.00642398	0.00642398	0.00642398	0.00642398	0.00642398	0.00642398	0.00642398	0.00642398	0.00642398
PJ14	0.0241275	0.0241275	0.0241275	0.0241275	0.0241275	0.0241275	0.0241275	0.0218853	0.0218853	0.0218853	0.0218853	0.0218853	0.0218853	0.0218853	0.0218853	0.0218853	0.0218853	0.0218853	0.0218853	0	0	0	0	0		0	0	0	0	0	0	0.00642398	0.00642398	0.00642398	0.00642398	0.00642398	0.00642398	0.00642398	0.00642398	0.00642398
LL2	0.0241275	0.0241275	0.0241275	0.0241275	0.0241275	0.0241275	0.0241275	0.0218853	0.0218853	0.0218853	0.0218853	0.0218853	0.0218853	0.0218853	0.0218853	0.0218853	0.0218853	0.0218853	0.0218853	0	0	0	0	0	0		0	0	0	0	0	0.00642398	0.00642398	0.00642398	0.00642398	0.00642398	0.00642398	0.00642398	0.00642398	0.00642398
PJ20	0.0241275	0.0241275	0.0241275	0.0241275	0.0241275	0.0241275	0.0241275	0.0218853	0.0218853	0.0218853	0.0218853	0.0218853	0.0218853	0.0218853	0.0218853	0.0218853	0.0218853	0.0218853	0.0218853	0	0	0	0	0	0	0		0	0	0	0	0.00642398	0.00642398	0.00642398	0.00642398	0.00642398	0.00642398	0.00642398	0.00642398	0.00642398
LL5	0.0241275	0.0241275	0.0241275	0.0241275	0.0241275	0.0241275	0.0241275	0.0218853	0.0218853	0.0218853	0.0218853	0.0218853	0.0218853	0.0218853	0.0218853	0.0218853	0.0218853	0.0218853	0.0218853	0	0	0	0	0	0	0	0		0	0	0	0.00642398	0.00642398	0.00642398	0.00642398	0.00642398	0.00642398	0.00642398	0.00642398	0.00642398
LL6	0.0241275	0.0241275	0.0241275	0.0241275	0.0241275	0.0241275	0.0241275	0.0218853	0.0218853	0.0218853	0.0218853	0.0218853	0.0218853	0.0218853	0.0218853	0.0218853	0.0218853	0.0218853	0.0218853	0	0	0	0	0	0	0	0	0		0	0	0.00642398	0.00642398	0.00642398	0.00642398	0.00642398	0.00642398	0.00642398	0.00642398	0.00642398
PJ16	0.0241275	0.0241275	0.0241275	0.0241275	0.0241275	0.0241275	0.0241275	0.0218853	0.0218853	0.0218853	0.0218853	0.0218853	0.0218853	0.0218853	0.0218853	0.0218853	0.0218853	0.0218853	0.0218853	0	0	0	0	0	0	0	0	0	0		0	0.00642398	0.00642398	0.00642398	0.00642398	0.00642398	0.00642398	0.00642398	0.00642398	0.00642398
PJ29	0.0241275	0.0241275	0.0241275	0.0241275	0.0241275	0.0241275	0.0241275	0.0218853	0.0218853	0.0218853	0.0218853	0.0218853	0.0218853	0.0218853	0.0218853	0.0218853	0.0218853	0.0218853	0.0218853	0	0	0	0	0	0	0	0	0	0	0		0.00642398	0.00642398	0.00642398	0.00642398	0.00642398	0.00642398	0.00642398	0.00642398	0.00642398
SJ2	0.0263253	0.0263253	0.0263253	0.0263253	0.0263253	0.0263253	0.0263253	0.0240781	0.0240781	0.0240781	0.0240781	0.0240781	0.0240781	0.0240781	0.0240781	0.0240781	0.0240781	0.0240781	0.0240781	0.00645515	0.00645515	0.00645515	0.00645515	0.00645515	0.00645515	0.00645515	0.00645515	0.00645515	0.00645515	0.00645515	0.00645515		0	0	0	0	0	0	0	0
SJ5	0.0263253	0.0263253	0.0263253	0.0263253	0.0263253	0.0263253	0.0263253	0.0240781	0.0240781	0.0240781	0.0240781	0.0240781	0.0240781	0.0240781	0.0240781	0.0240781	0.0240781	0.0240781	0.0240781	0.00645515	0.00645515	0.00645515	0.00645515	0.00645515	0.00645515	0.00645515	0.00645515	0.00645515	0.00645515	0.00645515	0.00645515	0		0	0	0	0	0	0	0
SJ7	0.0263253	0.0263253	0.0263253	0.0263253	0.0263253	0.0263253	0.0263253	0.0240781	0.0240781	0.0240781	0.0240781	0.0240781	0.0240781	0.0240781	0.0240781	0.0240781	0.0240781	0.0240781	0.0240781	0.00645515	0.00645515	0.00645515	0.00645515	0.00645515	0.00645515	0.00645515	0.00645515	0.00645515	0.00645515	0.00645515	0.00645515	0	0		0	0	0	0	0	0
SJ13	0.0263253	0.0263253	0.0263253	0.0263253	0.0263253	0.0263253	0.0263253	0.0240781	0.0240781	0.0240781	0.0240781	0.0240781	0.0240781	0.0240781	0.0240781	0.0240781	0.0240781	0.0240781	0.0240781	0.00645515	0.00645515	0.00645515	0.00645515	0.00645515	0.00645515	0.00645515	0.00645515	0.00645515	0.00645515	0.00645515	0.00645515	0	0	0		0	0	0	0	0
SJ14	0.0263253	0.0263253	0.0263253	0.0263253	0.0263253	0.0263253	0.0263253	0.0240781	0.0240781	0.0240781	0.0240781	0.0240781	0.0240781	0.0240781	0.0240781	0.0240781	0.0240781	0.0240781	0.0240781	0.00645515	0.00645515	0.00645515	0.00645515	0.00645515	0.00645515	0.00645515	0.00645515	0.00645515	0.00645515	0.00645515	0.00645515	0	0	0	0		0	0	0	0
PJ1	0.0263253	0.0263253	0.0263253	0.0263253	0.0263253	0.0263253	0.0263253	0.0240781	0.0240781	0.0240781	0.0240781	0.0240781	0.0240781	0.0240781	0.0240781	0.0240781	0.0240781	0.0240781	0.0240781	0.00645515	0.00645515	0.00645515	0.00645515	0.00645515	0.00645515	0.00645515	0.00645515	0.00645515	0.00645515	0.00645515	0.00645515	0	0	0	0	0		0	0	0
PJ13	0.0263253	0.0263253	0.0263253	0.0263253	0.0263253	0.0263253	0.0263253	0.0240781	0.0240781	0.0240781	0.0240781	0.0240781	0.0240781	0.0240781	0.0240781	0.0240781	0.0240781	0.0240781	0.0240781	0.00645515	0.00645515	0.00645515	0.00645515	0.00645515	0.00645515	0.00645515	0.00645515	0.00645515	0.00645515	0.00645515	0.00645515	0	0	0	0	0	0		0	0
PJ45	0.0263253	0.0263253	0.0263253	0.0263253	0.0263253	0.0263253	0.0263253	0.0240781	0.0240781	0.0240781	0.0240781	0.0240781	0.0240781	0.0240781	0.0240781	0.0240781	0.0240781	0.0240781	0.0240781	0.00645515	0.00645515	0.00645515	0.00645515	0.00645515	0.00645515	0.00645515	0.00645515	0.00645515	0.00645515	0.00645515	0.00645515	0	0	0	0	0	0	0		0
PJ5	0.0263253	0.0263253	0.0263253	0.0263253	0.0263253	0.0263253	0.0263253	0.0240781	0.0240781	0.0240781	0.0240781	0.0240781	0.0240781	0.0240781	0.0240781	0.0240781	0.0240781	0.0240781	0.0240781	0.00645515	0.00645515	0.00645515	0.00645515	0.00645515	0.00645515	0.00645515	0.00645515	0.00645515	0.00645515	0.00645515	0.00645515	0	0	0	0	0	0	0	0

## Sheet: Caption
Table. Estimates of Evolutionary Divergence between Sequences
The number of base substitutions per site from between sequences are shown. Analyses were conducted using the Kimura 2-parameter model [1]. The analysis involved 40 nucleotide sequences. All positions containing gaps and missing data were eliminated. There were a total of 467 positions in the final dataset. Evolutionary analyses were conducted in MEGA7 [2].
1. Kimura M. (1980). A simple method for estimating evolutionary rate of base substitutions through comparative studies of nucleotide sequences. Journal of Molecular Evolution 16:111-120.
2. Kumar S., Stecher G., and Tamura K. (2016). MEGA7: Molecular Evolutionary Genetics Analysis version 7.0 for bigger datasets.Molecular Biology and Evolution 33:1870-1874.
Disclaimer: Although utmost care has been taken to ensure the correctness of the caption, the caption text is provided "as is" without any warranty of any kind. Authors advise the user to carefully check the caption prior to its use for any purpose and report any errors or problems to the authors immediately (www.megasoftware.net). In no event shall the authors and their employers be liable for a…
