# Supplementary material for: The efficiency of universal mitochondrial DNA barcodes for species discrimination of Pomacea canaliculata and Pomacea maculata
Source: PeerJ. 2020 Apr 1;8:e8755. doi: 10.7717/peerj.8755 (PMC7127494; doi:10.7717/peerj.8755)
Supplement: Table S4 — The genetic distances were computed using the K2P (below diagonal) and uncorrected p-distance (above diagonal). [file peerj-08-8755-s004.xls]

## Sheet: MatrixOutput
Table S4: Genetic divergence analysis of the COI + 16S rDNA dataset based on pairwise alignment of all 40 Pomacea specimens. The genetic distances were computed using the K2P (below diagonal) and uncorrected p-distance (above diagonal).
Sample ID	SJ2	PJ13	SJ14	PJ5	PJ45	SJ5	SJ7	SJ13	PJ1	GC20	PJ14	GC8	LL2	GC18	LL5	PJ16	LL6	PJ20	GC6	PJ29	AN2	GC11	AN5	GC7	GC1	GC2	AN1	CC2	PJ11	PJ15	PJ2	PJ3	PJ4	AN3	AN4	CC1	CC4	GC5	CC5	CC3
SJ2		0	0	0	0	0	0	0	0	0.0269017	0.0269017	0.0269017	0.0269017	0.0269017	0.0296846	0.0269017	0.0269017	0.0269017	0.0269017	0.0269017	0.0667904	0.067718	0.067718	0.0593692	0.067718	0.067718	0.0667904	0.067718	0.0667904	0.0667904	0.0667904	0.0667904	0.0667904	0.0667904	0.0667904	0.0667904	0.0667904	0.067718	0.0667904	0.067718
PJ13	0		0	0	0	0	0	0	0	0.0269017	0.0269017	0.0269017	0.0269017	0.0269017	0.0296846	0.0269017	0.0269017	0.0269017	0.0269017	0.0269017	0.0667904	0.067718	0.067718	0.0593692	0.067718	0.067718	0.0667904	0.067718	0.0667904	0.0667904	0.0667904	0.0667904	0.0667904	0.0667904	0.0667904	0.0667904	0.0667904	0.067718	0.0667904	0.067718
SJ14	0	0		0	0	0	0	0	0	0.0269017	0.0269017	0.0269017	0.0269017	0.0269017	0.0296846	0.0269017	0.0269017	0.0269017	0.0269017	0.0269017	0.0667904	0.067718	0.067718	0.0593692	0.067718	0.067718	0.0667904	0.067718	0.0667904	0.0667904	0.0667904	0.0667904	0.0667904	0.0667904	0.0667904	0.0667904	0.0667904	0.067718	0.0667904	0.067718
PJ5	0	0	0		0	0	0	0	0	0.0269017	0.0269017	0.0269017	0.0269017	0.0269017	0.0296846	0.0269017	0.0269017	0.0269017	0.0269017	0.0269017	0.0667904	0.067718	0.067718	0.0593692	0.067718	0.067718	0.0667904	0.067718	0.0667904	0.0667904	0.0667904	0.0667904	0.0667904	0.0667904	0.0667904	0.0667904	0.0667904	0.067718	0.0667904	0.067718
PJ45	0	0	0	0		0	0	0	0	0.0269017	0.0269017	0.0269017	0.0269017	0.0269017	0.0296846	0.0269017	0.0269017	0.0269017	0.0269017	0.0269017	0.0667904	0.067718	0.067718	0.0593692	0.067718	0.067718	0.0667904	0.067718	0.0667904	0.0667904	0.0667904	0.0667904	0.0667904	0.0667904	0.0667904	0.0667904	0.0667904	0.067718	0.0667904	0.067718
SJ5	0	0	0	0	0		0	0	0	0.0269017	0.0269017	0.0269017	0.0269017	0.0269017	0.0296846	0.0269017	0.0269017	0.0269017	0.0269017	0.0269017	0.0667904	0.067718	0.067718	0.0593692	0.067718	0.067718	0.0667904	0.067718	0.0667904	0.0667904	0.0667904	0.0667904	0.0667904	0.0667904	0.0667904	0.0667904	0.0667904	0.067718	0.0667904	0.067718
SJ7	0	0	0	0	0	0		0	0	0.0269017	0.0269017	0.0269017	0.0269017	0.0269017	0.0296846	0.0269017	0.0269017	0.0269017	0.0269017	0.0269017	0.0667904	0.067718	0.067718	0.0593692	0.067718	0.067718	0.0667904	0.067718	0.0667904	0.0667904	0.0667904	0.0667904	0.0667904	0.0667904	0.0667904	0.0667904	0.0667904	0.067718	0.0667904	0.067718
SJ13	0	0	0	0	0	0	0		0	0.0269017	0.0269017	0.0269017	0.0269017	0.0269017	0.0296846	0.0269017	0.0269017	0.0269017	0.0269017	0.0269017	0.0667904	0.067718	0.067718	0.0593692	0.067718	0.067718	0.0667904	0.067718	0.0667904	0.0667904	0.0667904	0.0667904	0.0667904	0.0667904	0.0667904	0.0667904	0.0667904	0.067718	0.0667904	0.067718
PJ1	0	0	0	0	0	0	0	0		0.0269017	0.0269017	0.0269017	0.0269017	0.0269017	0.0296846	0.0269017	0.0269017	0.0269017	0.0269017	0.0269017	0.0667904	0.067718	0.067718	0.0593692	0.067718	0.067718	0.0667904	0.067718	0.0667904	0.0667904	0.0667904	0.0667904	0.0667904	0.0667904	0.0667904	0.0667904	0.0667904	0.067718	0.0667904	0.067718
GC20	0.0275374	0.0275374	0.0275374	0.0275374	0.0275374	0.0275374	0.0275374	0.0275374	0.0275374		0	0	0	0	0.00463822	0	0	0	0	0	0.0667904	0.067718	0.067718	0.0575139	0.067718	0.067718	0.0667904	0.067718	0.0667904	0.0667904	0.0667904	0.0667904	0.0667904	0.0667904	0.0667904	0.0667904	0.0667904	0.067718	0.0667904	0.067718
PJ14	0.0275374	0.0275374	0.0275374	0.0275374	0.0275374	0.0275374	0.0275374	0.0275374	0.0275374	0		0	0	0	0.00463822	0	0	0	0	0	0.0667904	0.067718	0.067718	0.0575139	0.067718	0.067718	0.0667904	0.067718	0.0667904	0.0667904	0.0667904	0.0667904	0.0667904	0.0667904	0.0667904	0.0667904	0.0667904	0.067718	0.0667904	0.067718
GC8	0.0275374	0.0275374	0.0275374	0.0275374	0.0275374	0.0275374	0.0275374	0.0275374	0.0275374	0	0		0	0	0.00463822	0	0	0	0	0	0.0667904	0.067718	0.067718	0.0575139	0.067718	0.067718	0.0667904	0.067718	0.0667904	0.0667904	0.0667904	0.0667904	0.0667904	0.0667904	0.0667904	0.0667904	0.0667904	0.067718	0.0667904	0.067718
LL2	0.0275374	0.0275374	0.0275374	0.0275374	0.0275374	0.0275374	0.0275374	0.0275374	0.0275374	0	0	0		0	0.00463822	0	0	0	0	0	0.0667904	0.067718	0.067718	0.0575139	0.067718	0.067718	0.0667904	0.067718	0.0667904	0.0667904	0.0667904	0.0667904	0.0667904	0.0667904	0.0667904	0.0667904	0.0667904	0.067718	0.0667904	0.067718
GC18	0.0275374	0.0275374	0.0275374	0.0275374	0.0275374	0.0275374	0.0275374	0.0275374	0.0275374	0	0	0	0		0.00463822	0	0	0	0	0	0.0667904	0.067718	0.067718	0.0575139	0.067718	0.067718	0.0667904	0.067718	0.0667904	0.0667904	0.0667904	0.0667904	0.0667904	0.0667904	0.0667904	0.0667904	0.0667904	0.067718	0.0667904	0.067718
LL5	0.0304114	0.0304114	0.0304114	0.0304114	0.0304114	0.0304114	0.0304114	0.0304114	0.0304114	0.00465444	0.00465444	0.00465444	0.00465444	0.00465444		0.00463822	0.00463822	0.00463822	0.00463822	0.00463822	0.0705009	0.0714286	0.0714286	0.0612245	0.0714286	0.0714286	0.0705009	0.0714286	0.0705009	0.0705009	0.0705009	0.0705009	0.0705009	0.0705009	0.0705009	0.0705009	0.0705009	0.0714286	0.0705009	0.0714286
PJ16	0.0275374	0.0275374	0.0275374	0.0275374	0.0275374	0.0275374	0.0275374	0.0275374	0.0275374	0	0	0	0	0	0.00465444		0	0	0	0	0.0667904	0.067718	0.067718	0.0575139	0.067718	0.067718	0.0667904	0.067718	0.0667904	0.0667904	0.0667904	0.0667904	0.0667904	0.0667904	0.0667904	0.0667904	0.0667904	0.067718	0.0667904	0.067718
LL6	0.0275374	0.0275374	0.0275374	0.0275374	0.0275374	0.0275374	0.0275374	0.0275374	0.0275374	0	0	0	0	0	0.00465444	0		0	0	0	0.0667904	0.067718	0.067718	0.0575139	0.067718	0.067718	0.0667904	0.067718	0.0667904	0.0667904	0.0667904	0.0667904	0.0667904	0.0667904	0.0667904	0.0667904	0.0667904	0.067718	0.0667904	0.067718
PJ20	0.0275374	0.0275374	0.0275374	0.0275374	0.0275374	0.0275374	0.0275374	0.0275374	0.0275374	0	0	0	0	0	0.00465444	0	0		0	0	0.0667904	0.067718	0.067718	0.0575139	0.067718	0.067718	0.0667904	0.067718	0.0667904	0.0667904	0.0667904	0.0667904	0.0667904	0.0667904	0.0667904	0.0667904	0.0667904	0.067718	0.0667904	0.067718
GC6	0.0275374	0.0275374	0.0275374	0.0275374	0.0275374	0.0275374	0.0275374	0.0275374	0.0275374	0	0	0	0	0	0.00465444	0	0	0		0	0.0667904	0.067718	0.067718	0.0575139	0.067718	0.067718	0.0667904	0.067718	0.0667904	0.0667904	0.0667904	0.0667904	0.0667904	0.0667904	0.0667904	0.0667904	0.0667904	0.067718	0.0667904	0.067718
PJ29	0.0275374	0.0275374	0.0275374	0.0275374	0.0275374	0.0275374	0.0275374	0.0275374	0.0275374	0	0	0	0	0	0.00465444	0	0	0	0		0.0667904	0.067718	0.067718	0.0575139	0.067718	0.067718	0.0667904	0.067718	0.0667904	0.0667904	0.0667904	0.0667904	0.0667904	0.0667904	0.0667904	0.0667904	0.0667904	0.067718	0.0667904	0.067718
AN2	0.0711671	0.0711671	0.0711671	0.0711671	0.0711671	0.0711671	0.0711671	0.0711671	0.0711671	0.0712278	0.0712278	0.0712278	0.0712278	0.0712278	0.0751852	0.0712278	0.0712278	0.0712278	0.0712278	0.0712278		0.000927644	0.000927644	0.00927644	0.000927644	0.000927644	0	0.000927644	0	0	0	0	0	0	0	0	0	0.000927644	0	0.000927644
GC11	0.0722298	0.0722298	0.0722298	0.0722298	0.0722298	0.0722298	0.0722298	0.0722298	0.0722298	0.0722917	0.0722917	0.0722917	0.0722917	0.0722917	0.0762524	0.0722917	0.0722917	0.0722917	0.0722917	0.0722917	0.000928505		0	0.0102041	0	0	0.000927644	0	0.000927644	0.000927644	0.000927644	0.000927644	0.000927644	0.000927644	0.000927644	0.000927644	0.000927644	0	0.000927644	0
AN5	0.0722298	0.0722298	0.0722298	0.0722298	0.0722298	0.0722298	0.0722298	0.0722298	0.0722298	0.0722917	0.0722917	0.0722917	0.0722917	0.0722917	0.0762524	0.0722917	0.0722917	0.0722917	0.0722917	0.0722917	0.000928505	0		0.0102041	0	0	0.000927644	0	0.000927644	0.000927644	0.000927644	0.000927644	0.000927644	0.000927644	0.000927644	0.000927644	0.000927644	0	0.000927644	0
GC7	0.0627459	0.0627459	0.0627459	0.0627459	0.0627459	0.0627459	0.0627459	0.0627459	0.0627459	0.0607122	0.0607122	0.0607122	0.0607122	0.0607122	0.0646362	0.0607122	0.0607122	0.0607122	0.0607122	0.0607122	0.00936357	0.0103096	0.0103096		0.0102041	0.0102041	0.00927644	0.0102041	0.00927644	0.00927644	0.00927644	0.00927644	0.00927644	0.00927644	0.00927644	0.00927644	0.00927644	0.0102041	0.00927644	0.0102041
GC1	0.0722298	0.0722298	0.0722298	0.0722298	0.0722298	0.0722298	0.0722298	0.0722298	0.0722298	0.0722917	0.0722917	0.0722917	0.0722917	0.0722917	0.0762524	0.0722917	0.0722917	0.0722917	0.0722917	0.0722917	0.000928505	0	0	0.0103096		0	0.000927644	0	0.000927644	0.000927644	0.000927644	0.000927644	0.000927644	0.000927644	0.000927644	0.000927644	0.000927644	0	0.000927644	0
GC2	0.0722298	0.0722298	0.0722298	0.0722298	0.0722298	0.0722298	0.0722298	0.0722298	0.0722298	0.0722917	0.0722917	0.0722917	0.0722917	0.0722917	0.0762524	0.0722917	0.0722917	0.0722917	0.0722917	0.0722917	0.000928505	0	0	0.0103096	0		0.000927644	0	0.000927644	0.000927644	0.000927644	0.000927644	0.000927644	0.000927644	0.000927644	0.000927644	0.000927644	0	0.000927644	0
AN1	0.0711671	0.0711671	0.0711671	0.0711671	0.0711671	0.0711671	0.0711671	0.0711671	0.0711671	0.0712278	0.0712278	0.0712278	0.0712278	0.0712278	0.0751852	0.0712278	0.0712278	0.0712278	0.0712278	0.0712278	0	0.000928505	0.000928505	0.00936357	0.000928505	0.000928505		0.000927644	0	0	0	0	0	0	0	0	0	0.000927644	0	0.000927644
CC2	0.0722298	0.0722298	0.0722298	0.0722298	0.0722298	0.0722298	0.0722298	0.0722298	0.0722298	0.0722917	0.0722917	0.0722917	0.0722917	0.0722917	0.0762524	0.0722917	0.0722917	0.0722917	0.0722917	0.0722917	0.000928505	0	0	0.0103096	0	0	0.000928505		0.000927644	0.000927644	0.000927644	0.000927644	0.000927644	0.000927644	0.000927644	0.000927644	0.000927644	0	0.000927644	0
PJ11	0.0711671	0.0711671	0.0711671	0.0711671	0.0711671	0.0711671	0.0711671	0.0711671	0.0711671	0.0712278	0.0712278	0.0712278	0.0712278	0.0712278	0.0751852	0.0712278	0.0712278	0.0712278	0.0712278	0.0712278	0	0.000928505	0.000928505	0.00936357	0.000928505	0.000928505	0	0.000928505		0	0	0	0	0	0	0	0	0.000927644	0	0.000927644
PJ15	0.0711671	0.0711671	0.0711671	0.0711671	0.0711671	0.0711671	0.0711671	0.0711671	0.0711671	0.0712278	0.0712278	0.0712278	0.0712278	0.0712278	0.0751852	0.0712278	0.0712278	0.0712278	0.0712278	0.0712278	0	0.000928505	0.000928505	0.00936357	0.000928505	0.000928505	0	0.000928505	0		0	0	0	0	0	0	0	0.000927644	0	0.000927644
PJ2	0.0711671	0.0711671	0.0711671	0.0711671	0.0711671	0.0711671	0.0711671	0.0711671	0.0711671	0.0712278	0.0712278	0.0712278	0.0712278	0.0712278	0.0751852	0.0712278	0.0712278	0.0712278	0.0712278	0.0712278	0	0.000928505	0.000928505	0.00936357	0.000928505	0.000928505	0	0.000928505	0	0		0	0	0	0	0	0	0.000927644	0	0.000927644
PJ3	0.0711671	0.0711671	0.0711671	0.0711671	0.0711671	0.0711671	0.0711671	0.0711671	0.0711671	0.0712278	0.0712278	0.0712278	0.0712278	0.0712278	0.0751852	0.0712278	0.0712278	0.0712278	0.0712278	0.0712278	0	0.000928505	0.000928505	0.00936357	0.000928505	0.000928505	0	0.000928505	0	0	0		0	0	0	0	0	0.000927644	0	0.000927644
PJ4	0.0711671	0.0711671	0.0711671	0.0711671	0.0711671	0.0711671	0.0711671	0.0711671	0.0711671	0.0712278	0.0712278	0.0712278	0.0712278	0.0712278	0.0751852	0.0712278	0.0712278	0.0712278	0.0712278	0.0712278	0	0.000928505	0.000928505	0.00936357	0.000928505	0.000928505	0	0.000928505	0	0	0	0		0	0	0	0	0.000927644	0	0.000927644
AN3	0.0711671	0.0711671	0.0711671	0.0711671	0.0711671	0.0711671	0.0711671	0.0711671	0.0711671	0.0712278	0.0712278	0.0712278	0.0712278	0.0712278	0.0751852	0.0712278	0.0712278	0.0712278	0.0712278	0.0712278	0	0.000928505	0.000928505	0.00936357	0.000928505	0.000928505	0	0.000928505	0	0	0	0	0		0	0	0	0.000927644	0	0.000927644
AN4	0.0711671	0.0711671	0.0711671	0.0711671	0.0711671	0.0711671	0.0711671	0.0711671	0.0711671	0.0712278	0.0712278	0.0712278	0.0712278	0.0712278	0.0751852	0.0712278	0.0712278	0.0712278	0.0712278	0.0712278	0	0.000928505	0.000928505	0.00936357	0.000928505	0.000928505	0	0.000928505	0	0	0	0	0	0		0	0	0.000927644	0	0.000927644
CC1	0.0711671	0.0711671	0.0711671	0.0711671	0.0711671	0.0711671	0.0711671	0.0711671	0.0711671	0.0712278	0.0712278	0.0712278	0.0712278	0.0712278	0.0751852	0.0712278	0.0712278	0.0712278	0.0712278	0.0712278	0	0.000928505	0.000928505	0.00936357	0.000928505	0.000928505	0	0.000928505	0	0	0	0	0	0	0		0	0.000927644	0	0.000927644
CC4	0.0711671	0.0711671	0.0711671	0.0711671	0.0711671	0.0711671	0.0711671	0.0711671	0.0711671	0.0712278	0.0712278	0.0712278	0.0712278	0.0712278	0.0751852	0.0712278	0.0712278	0.0712278	0.0712278	0.0712278	0	0.000928505	0.000928505	0.00936357	0.000928505	0.000928505	0	0.000928505	0	0	0	0	0	0	0	0		0.000927644	0	0.000927644
GC5	0.0722298	0.0722298	0.0722298	0.0722298	0.0722298	0.0722298	0.0722298	0.0722298	0.0722298	0.0722917	0.0722917	0.0722917	0.0722917	0.0722917	0.0762524	0.0722917	0.0722917	0.0722917	0.0722917	0.0722917	0.000928505	0	0	0.0103096	0	0	0.000928505	0	0.000928505	0.000928505	0.000928505	0.000928505	0.000928505	0.000928505	0.000928505	0.000928505	0.000928505		0.000927644	0
CC5	0.0711671	0.0711671	0.0711671	0.0711671	0.0711671	0.0711671	0.0711671	0.0711671	0.0711671	0.0712278	0.0712278	0.0712278	0.0712278	0.0712278	0.0751852	0.0712278	0.0712278	0.0712278	0.0712278	0.0712278	0	0.000928505	0.000928505	0.00936357	0.000928505	0.000928505	0	0.000928505	0	0	0	0	0	0	0	0	0	0.000928505		0.000927644
CC3	0.0722298	0.0722298	0.0722298	0.0722298	0.0722298	0.0722298	0.0722298	0.0722298	0.0722298	0.0722917	0.0722917	0.0722917	0.0722917	0.0722917	0.0762524	0.0722917	0.0722917	0.0722917	0.0722917	0.0722917	0.000928505	0	0	0.0103096	0	0	0.000928505	0	0.000928505	0.000928505	0.000928505	0.000928505	0.000928505	0.000928505	0.000928505	0.000928505	0.000928505	0	0.000928505

## Sheet: Caption
Table. Estimates of Evolutionary Divergence between Sequences
The number of base substitutions per site from between sequences are shown. Analyses were conducted using the Kimura 2-parameter model [1]. The analysis involved 40 nucleotide sequences. All positions containing gaps and missing data were eliminated. There were a total of 1078 positions in the final dataset. Evolutionary analyses were conducted in MEGA7 [2].
1. Kimura M. (1980). A simple method for estimating evolutionary rate of base substitutions through comparative studies of nucleotide sequences. Journal of Molecular Evolution 16:111-120.
2. Kumar S., Stecher G., and Tamura K. (2016). MEGA7: Molecular Evolutionary Genetics Analysis version 7.0 for bigger datasets.Molecular Biology and Evolution 33:1870-1874.
Disclaimer: Although utmost care has been taken to ensure the correctness of the caption, the caption text is provided "as is" without any warranty of any kind. Authors advise the user to carefully check the caption prior to its use for any purpose and report any errors or problems to the authors immediately (www.megasoftware.net). In no event shall the authors and their employers be liable for a…
